# Supplementary material for: Colonization of Warsaw by the red fox Vulpes vulpes in the years 1976–2019
Source: PubMed Central journal article supplement (PMC8260808; doi:10.1038/s41598-021-92844-2), 2021-07-06
Supplement: 41598_2021_92844_MOESM1_ESM.pdf [file 41598_2021_92844_MOESM1_ESM.pdf]

## **SUPPLEMENTARY INFORMATION FILE**

**Colonization of Warsaw by the red fox *Vulpes vulpes* in the years**

**1976-2019**

Mateusz Jackowiak, Jakub Gryz, Karolina Jasińska, Michał Brach, Leszek Bolibok, Piotr Kowal, Dagny Krauze-Gryz

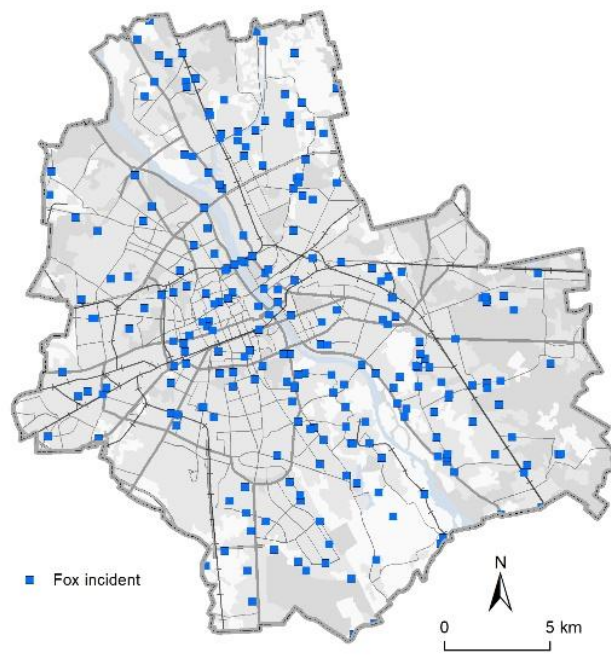

Fig S1. The location of incidents involving the red fox in Warsaw in the years 1998-2015 as based on the reports (1998-2015), delivered by the Municipal Forests – Warsaw.

Table S1. Classes of generalized Urban Atlas (UA) layer [56], used in spatial analysis of the red fox incidents in Warsaw

| Class number | Class name          | Description                                                                                                                                                                                                                                                                                    |
|--------------|---------------------|------------------------------------------------------------------------------------------------------------------------------------------------------------------------------------------------------------------------------------------------------------------------------------------------|
| 1            | Continuous urban    | Continuous urban fabric: buildings, roads and sealed areas cover most of the area; non-linear areas of vegetation and bare soil are exceptional.<br>Average degree of soil sealing >80%.                                                                                                       |
| 2            | Discontinuous urban | Discontinuous urban fabric: build-up areas; a larger fraction (as opposed to continuous urban fabric) of non-sealed and/or vegetated surfaces (gardens, parks, planted areas and non-surfaced public areas) is included.<br>Average degree of imperviousness/soil sealing is between 0 to 80%. |
| 3            | Industrial          | Industrial or commercial units, road and rail networks and associated land, port areas, airports, mineral extraction sites, dump sites, construction sites                                                                                                                                     |
| 4            | Parks               | Green urban areas, sport and leisure facilities                                                                                                                                                                                                                                                |
| 5            | Agricultural areas  | Arable land, non-irrigated arable land, permanently irrigated land, vineyards, permanent crops, fruit trees and berry plantations, heterogeneous agricultural areas                                                                                                                            |
| 6            | Forests             | Broad-leaved forest, coniferous forest, mixed forest, natural grasslands                                                                                                                                                                                                                       |
| 7            | Wetlands            | Inland wetlands, inland marshes, water courses, water bodies, estuaries                                                                                                                                                                                                                        |

Table S2. Characteristics of green areas, used to monitor the progress of Warsaw colonization by the red fox. 29 randomly selected areas has been chosen to monitor progress of city colonization by the red fox in subsequent years: 1976-1978 (Goszczyński J., unpubl. data), 2004-2012 and 2016-2019. The table shows the name of the area, type of a habitat, surface, distance to the city centre and the presence (+)/absence (-) of red fox based on winter tracking.

| Area                                                          | habitat<br>type    | surface<br>[ha] | distance to the city<br>centre*[km] | fox presence  |               |               |
|---------------------------------------------------------------|--------------------|-----------------|-------------------------------------|---------------|---------------|---------------|
|                                                               |                    |                 |                                     | 1976-<br>1978 | 2004-<br>2012 | 2016-<br>2019 |
| Bródno Cemetery                                               | cemetery           | 113             | 5.71                                | -             | -             | +             |
| Evangelical-Augsburg Cemetery<br>(Wola)                       | cemetery           | 7               | 2.62                                | -             | -             | +             |
| Powązki Cemetery                                              | cemetery           | 43              | 3.30                                | -             | +             | +             |
| Orthodox Cemetery (Wola)                                      | cemetery           | 13              | 2.79                                | -             | +             | +             |
| Powązki Military Cemetery                                     | cemetery           | 24              | 4.66                                | -             | +             | +             |
| Soviet Military Cemetery                                      | cemetery           | 19              | 3.47                                | -             | +             | +             |
| Bielany Forest                                                | forest             | 130             | 7.57                                | +             | +             | +             |
| Bródno Forest                                                 | forest             | 134             | 8.27                                | +             | +             | +             |
| Nowa Warszawa Forest                                          | forest             | 139             | 10.71                               | +             | +             | +             |
| Koło Forest                                                   | forest             | 44              | 4.45                                | -             | +             | +             |
| The Vistula River valley:                                     |                    |                 |                                     |               |               |               |
| vicinity of Poniatowski Bridge<br>(left bank)                 | riparian<br>forest | -               | 2.63                                | -             | -             | +             |
| Praga Harbour and vicinity of<br>Wybrzeże Szczecińskie Street | riparian<br>forest | -               | 2.49                                | -             | -             | +             |
| vicinity of Ślasko-Dąbrowski                                  | riparian           | -               | 2.41                                | -             | -             | +             |

|                                    |             |                 |    |      |   |   |   |
|------------------------------------|-------------|-----------------|----|------|---|---|---|
|                                    | Bridge      | forest          |    |      |   |   |   |
|                                    | (left bank) |                 |    |      |   |   |   |
| Żerań Harbour and Żerań Channel    |             | riparian forest | -  | 6.94 | + | + | + |
| vicinity of Bartycka Street        |             | riparian forest | -  | 3.95 | + | + | + |
| vicinity of the water intake       |             | riparian forest | -  | 3.69 | - | - | + |
| Gdański Bridge (left bank)         |             | riparian forest | -  | 3.30 | + | + | + |
| Saxon Garden                       |             | park            | 16 | 1.00 | - | - | - |
| Arkadia Park                       |             | park            | 11 | 4.87 | - | + | + |
| Fos Park                           |             | park            | 18 | 3.92 | - | + | + |
| Marshal Rydz-Śmigły Park           |             | park            | 53 | 1.65 | - | - | + |
| Kępa Potocka Park                  |             | park            | 18 | 5.34 | - | + | + |
| Kraśiński Garden                   |             | park            | 12 | 1.89 | - | - | - |
| Royal Łazienki Park                |             | park            | 76 | 2.68 | - | + | + |
| Praga Park (and ZOO)               |             | park            | 58 | 2.84 | - | - | + |
| Skaryszew Park                     |             | park            | 58 | 3.51 | - | + | + |
| Traugutt Park                      |             | park            | 10 | 2.90 | - | - | + |
| Olszynka Grochowska Nature Reserve |             | forest          | 57 | 8.11 | - | + | + |
| Powstańcy Styczniowi Square        |             | park            | 5  | 8.11 | - | + | + |

\* measured to the Palace of Culture and Science, assumed as the most central point of the city
